# Supplementary material
Source: Springer Nature journal article supplement (https://www.springermedizin.de/resource/supplementary/12913_2012_3017_MOESM3_ESM.pdf/9533314)
Supplement: MOESM3 [file 9533314]

Ministry of Health – National Office

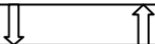

Health committees at the Provincial Office

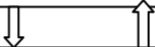

District Health Management Team- DHMT

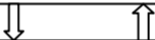

Hospital Management Team

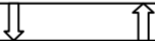

Health Centre Committee

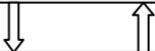

Health Post Committee/NHC
